# Supplementary material
Source: PubMed Central journal article supplement (PMC3358497)
Supplement: NIHMS371703-supplement-1_si_001.pdf [file NIHMS371703-supplement-1_si_001.pdf]

**Metabolism and Distribution of Benzo[*a*]pyrene-7,8-dione (B[*a*]P-7,8-dione) in Human Lung Cells by Liquid Chromatography Tandem Mass Spectrometry: Detection of an Adenine B[*a*]P-7,8-dione Adduct.**

Meng Huang,<sup>†</sup> Xiaojing Liu,<sup>‡</sup> Sankha S. Basu,<sup>‡</sup> Li Zhang,<sup>†</sup> Mary E. Kushman,<sup>†</sup>  
Ronald G. Harvey,<sup>§</sup> Ian A. Blair,<sup>‡</sup> and Trevor M. Penning<sup>\*,†</sup>

<sup>†</sup> Center of Excellence in Environmental Toxicology and <sup>‡</sup> Center for Cancer Pharmacology,  
Department of Pharmacology, Perelman School of Medicine, University of Pennsylvania,  
Philadelphia, Pennsylvania 19104, United States

<sup>§</sup> The Ben May Department for Cancer Research, University of Chicago, Chicago, Illinois 60637,  
United States

**Supporting Information Available**

Distribution of 1,3-<sup>3</sup>H<sub>2</sub>-B[*a*]P-7,8-dione radioactivity in three human lung cell lines (Figure S-1).

HPLC radio-chromatograms and UV chromatograms (348 nm) of extracts from organic phase of media in H358 cells (Figure S-2) and HBEC-KT cells (Figure S-3).

**Figure S-1.** Distribution of 2 μM 1,3-<sup>3</sup>H<sub>2</sub>-B[*a*]P-7,8-dione in A549 (A), H358 (B) and HBEC-KT (C) cells. (◆: aqueous phase of media; ■: organic phase of media; ▲: cell lysate pellets; \*: aqueous phase of cell lysate supernatants; ●: organic phase of cell lysate supernatants.) A549, H358 and HBEC-KT cells ( $5 \times 10^6$ ) were incubated with 1,3-<sup>3</sup>H<sub>2</sub>-B[*a*]P-7,8-dione (2 μM, 1

$\times 10^5$  cpm/nmol, 0.2 % DMSO) in HBSS buffer containing 1 mM sodium pyruvate. The culture media and the cells were collected separately over time and were extracted with ethyl acetate before counting. The mean  $\pm$  SD for triplicate determinations are shown.

**Figure S-2.** HPLC radio-chromatogram (A) and UV chromatogram (348 nm) (B) of extracts from organic phase of media in H358 cells at 24h. H358 cells ( $5 \times 10^6$ ) were treated with [1,3- $^3\text{H}$ ]-B[a]P-7,8-dione (2  $\mu\text{M}$ ,  $1 \times 10^5$  cpm/nmol, 0.2 % DMSO) in the same manner as described in the legend of Figure 1. The culture media were collected at 24 h, and subsequently acidified with 0.1% formic acid before extraction with ethyl acetate. The extracts were analyzed on a HPLC-UV-RAM.

**Figure S-3.** HPLC radio-chromatogram (A) and UV chromatogram (348 nm) (B) of extracts from organic phase of media in HBEC-KT cells at 24h. HBEC-KT cells ( $5 \times 10^6$ ) were treated with [1,3- $^3\text{H}$ ]-B[a]P-7,8-dione (2  $\mu\text{M}$ ,  $1 \times 10^5$  cpm/nmol, 0.2 % DMSO) in the same manner as described in the legend of Figure 1. The culture media were collected at 24 h, and subsequently acidified with 0.1% formic acid before extraction with ethyl acetate. The extracts were analyzed on a HPLC-UV-RAM.

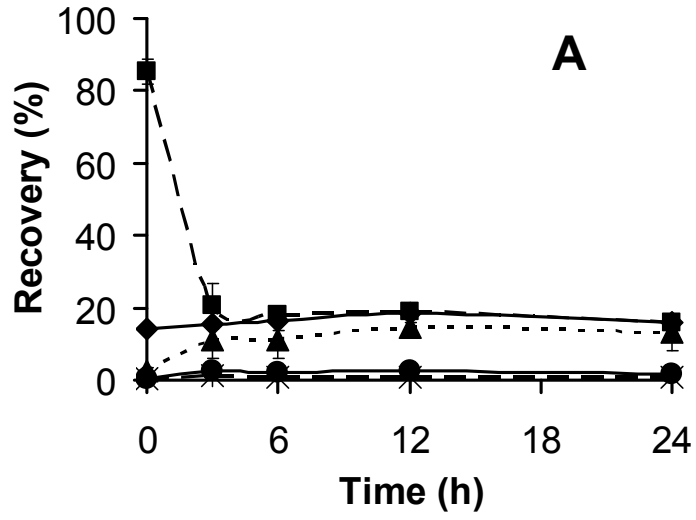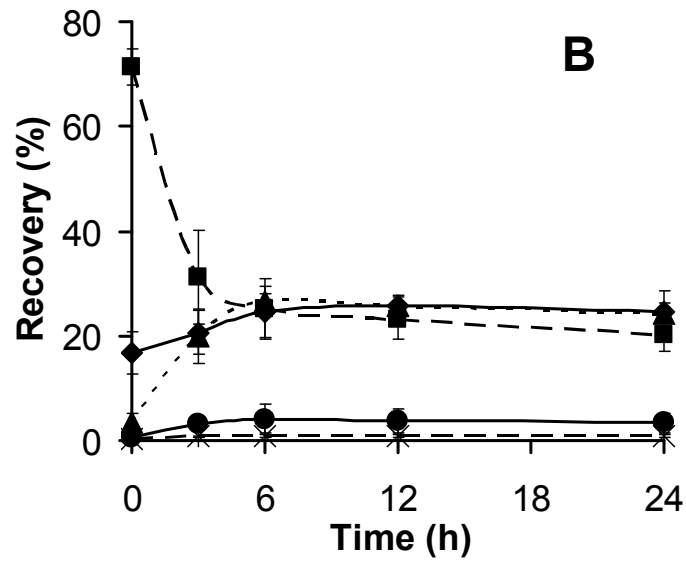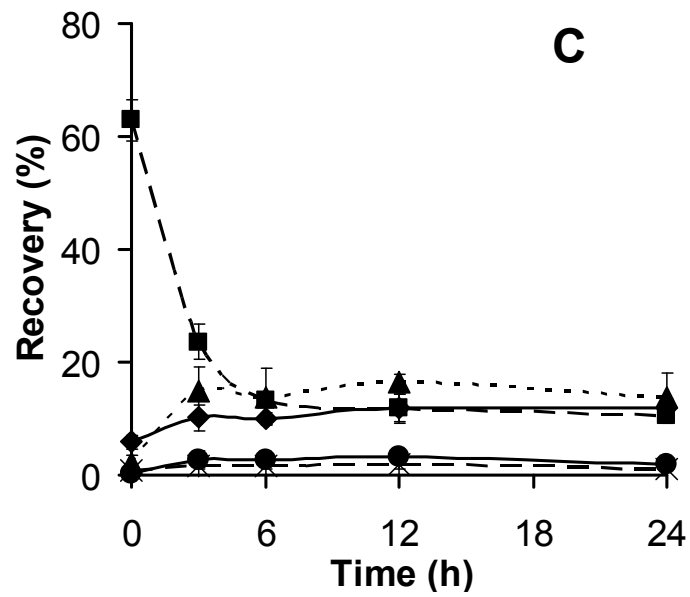

Figure S-1.

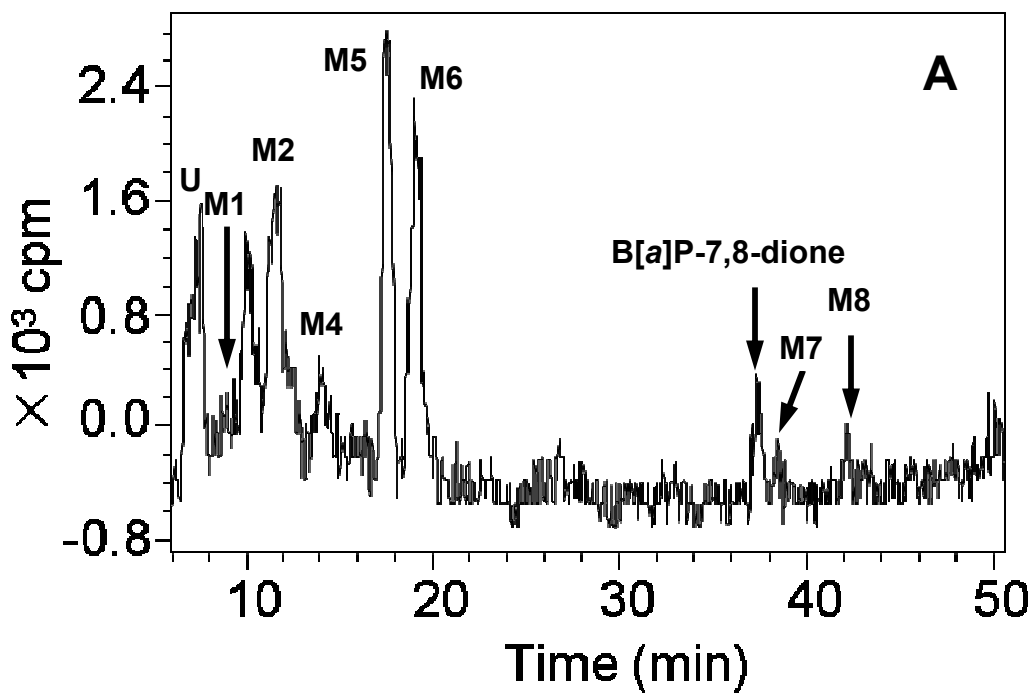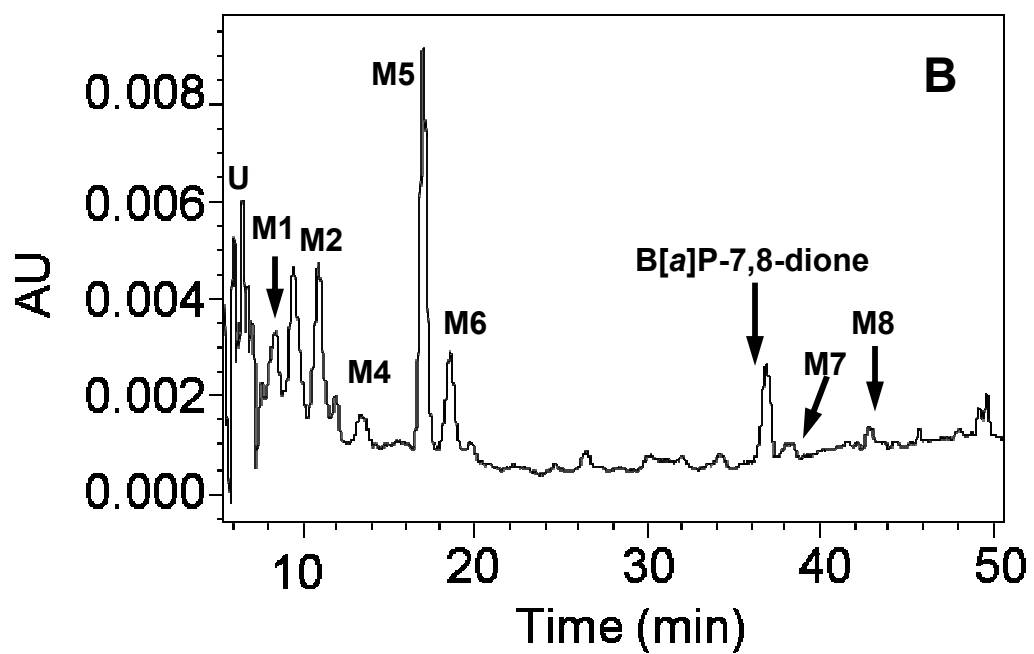

Figure S-2.

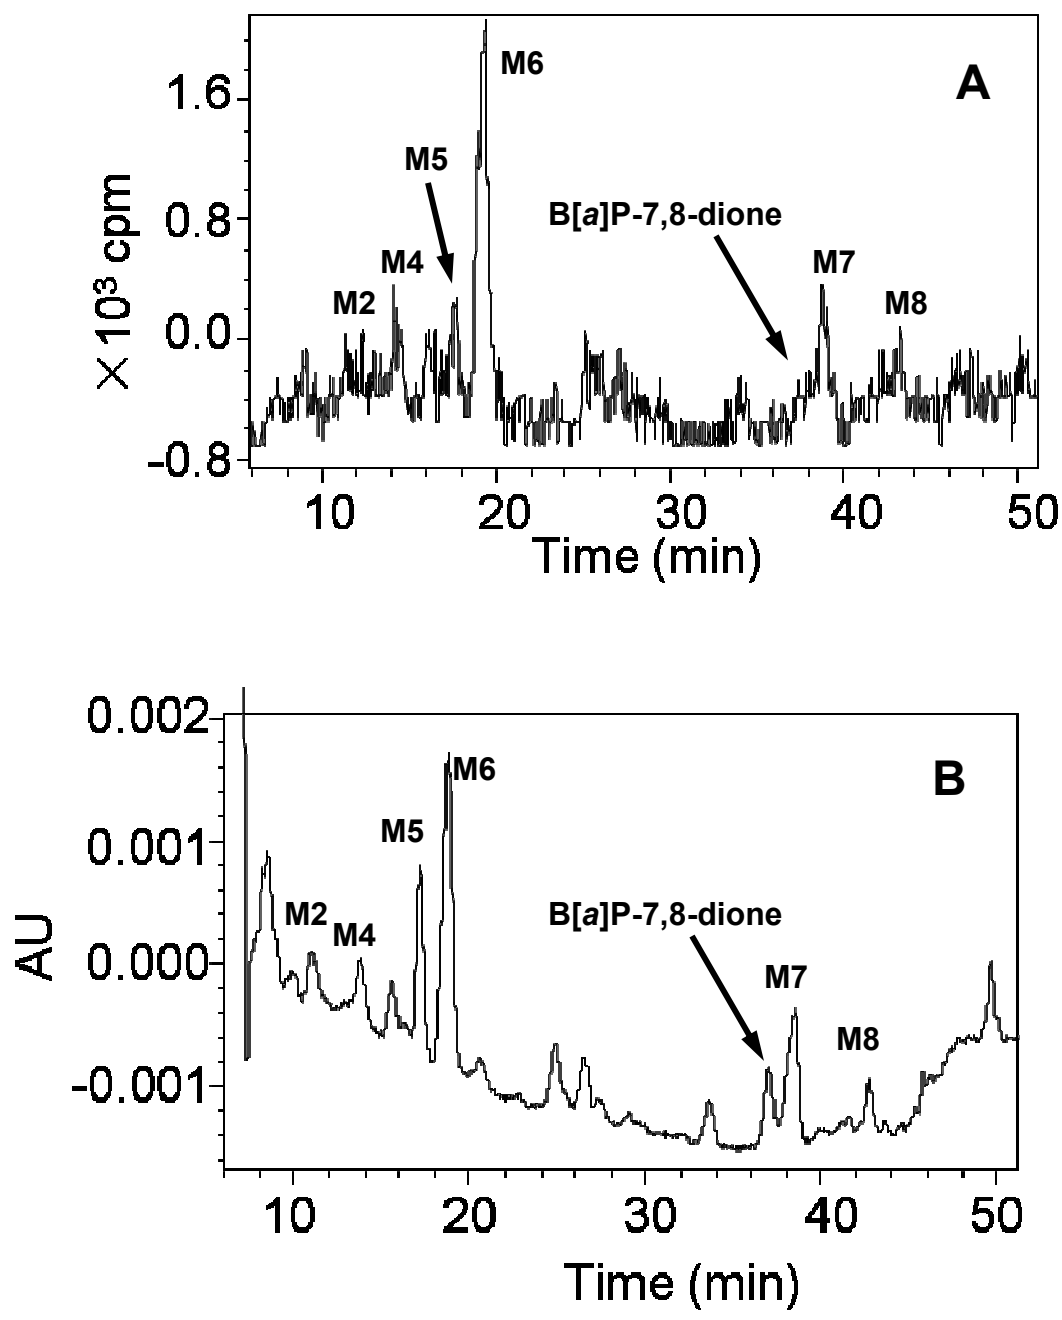

Figure S-3.
